# Supplementary material for: Geodetic point surface mass balances: A new approach to determine point surface mass balances from remote sensing measurements
Source: Copernicus journal article supplement (doi:10.5194/tc-2020-239), 2020-09-11

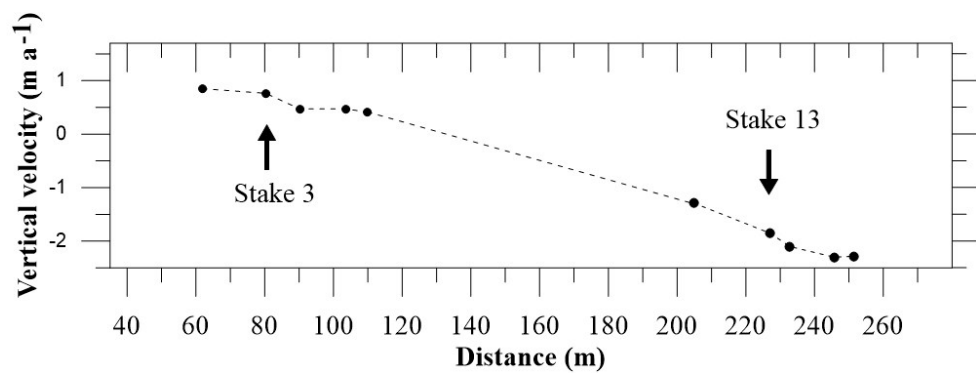

Supplement: Supplementary file [file tc-2020-239-AC2-supplement.pdf]
